# Supplementary material
Source: Research Square preprint supplement (doi:10.21203/rs.3.rs-8804563/v1)
Supplement: Supplementary file 1 [file a141e270e85f233c6e8a3a98.docx]

Supplementary Material

# **1. Supplementary Tables**

**1.1 Supplementary Table 1.** Multivariate Cox Proportional Hazards Model Analysis of the effect of postoperative pro-GRP status on prognosis

|  | Standard Error | Wald test | P-value | Hazard Ratio | 95% CI |
| --- | --- | --- | --- | --- | --- |
| DFS | 0.416 | 8.763 | 0.003 | 0.292 | 0.129-0.660 |
| OS | 0.471 | 9.508 | 0.002 | 0.234 | 0.093-0.589 |

CI, Confidence Interval.

**1.2 Supplementary Table 2.** Recurrence Pattern

| Patient ID | Neoadjuvant Treatment | AJCC stage | Postoperative pathology | DFS duration (mo) | Site of Recurrence | Additional Treatment | Alive (Y/N) |
| --- | --- | --- | --- | --- | --- | --- | --- |
| 1 | chemotherapy | Ib | Non MPR | 10.0 | Intrathoracic | Chemotherapy | N |
| 2 | chemotherapy | Ib | Non MPR | 70.9 | Intrathoracic | Chemotherapy | N |
| 3 | chemotherapy | IIb | Non MPR | 33.9 | Intrathoracic | Chemotherapy | N |
| 4 | chemotherapy | IIIa | MPR | 90.6 | Intrathoracic | NO | Y |
| 5 | chemotherapy | Ia | pCR | 4.9 | Adrenal gland | Chemotherapy+Radiotherapy | N |
| 6 | chemotherapy | Ib | Non MPR | 9.7 | Intrathoracic | Chemotherapy+Radiotherapy | N |
| 7 | chemotherapy | IIIb | MPR | 19.8 | Intrathoracic | Chemotherapy | N |
| 8 | chemotherapy | IIIb | Non MPR | 21.2 | Intrathoracic | Chemotherapy+Radiotherapy | N |
| 9 | chemotherapy | IIb | MPR | 19.0 | Liver | Chemotherapy+Radiotherapy | N |
| 10 | chemotherapy | IIa | Non MPR | 6.1 | Liver、Adrenal gland | Chemotherapy+Radiotherapy | N |
| 11 | chemotherapy | IIIb | Non MPR | 8.5 | Cervical lymph nodes | Chemotherapy+Radiotherapy | N |
| 12 | chemotherapy | IIIa | Non MPR | 17.9 | Intrathoracic | Chemotherapy | N |
| 13 | chemotherapy | Ia | Non MPR | 5.7 | Intrathoracic | Chemotherapy | N |
| 14 | chemotherapy | IIIa | Non MPR | 28.9 | Liver | Chemotherapy | N |
| 15 | chemotherapy | IIb | pCR | 17.0 | Brain | Chemotherapy | Y |
| 16 | chemotherapy | IIIa | Non MPR | 10.0 | Adrenal gland | Chemotherapy+Radiotherapy | N |
| 17 | chemotherapy | IIIc | MPR | 6.3 | Intrathoracic | Chemotherapy | N |
| 18 | chemotherapy | IIIa | Non MPR | 4.8 | Intrathoracic | Chemotherapy+Radiotherapy | N |
| 19 | chemotherapy | IIIb | Non MPR | 4.8 | Intrathoracic | Chemotherapy+Immunotherapy | N |
| 20 | chemotherapy | IIIa | Non MPR | 5.7 | Bone | Chemotherapy+Radiotherapy  +Immunotherapy | N |
| 21 | chemotherapy | IIb | Non MPR | 5.5 | Intrathoraci、Liver、  Adrenal gland | Chemotherapy+Radiotherapy  +Immunotherapy | N |
| 22 | chemotherapy | IIIb | pCR | 5.4 | Adrenal gland | Chemotherapy+Immunotherapy | N |
| 23 | chemotherapy | IIIa | Non MPR | 17.3 | Intrathoracic | Chemotherapy | Y |
| 24 | chemotherapy | Ib | Non MPR | 17.1 | Intrathoracic | Chemotherapy | Y |
| 25 | chemotherapy | IIb | MPR | 6.6 | Brain | Chemotherapy | Y |
| 26 | chemotherapy | IIIb | Non MPR | 4.5 | Intrathoracic | Chemotherapy+Immunotherapy | Y |
| 27 | chemotherapy | IIb | Non MPR | 1.1 | Cervical lymph nodes | Chemotherapy | Y |
| 28 | chemotherapy | IIIb | MPR | 9.0 | Brain | Chemotherapy | N |
| 29 | chemotherapy | IIIa | Non MPR | 5.4 | Liver | Chemotherapy | N |
| 30 | chemotherapy | IIIa | Non MPR | 4.3 | Intrathoracic | NO | N |
| 31 | chemotherapy | IIIa | pCR | 7.2 | Brain | Chemotherapy | N |
| 32 | chemoimmunotherapy | IIb | Non MPR | 0.9 | Intrathoracic | NO | N |
| 33 | chemoimmunotherapy | IIIb | MPR | 48.7 | Liver | Chemotherapy+Immunotherapy | Y |
| 34 | chemoimmunotherapy | IIIa | Non MPR | 8.9 | Bone | Chemotherapy+Immunotherapy | N |
| 35 | chemoimmunotherapy | IIIa | Non MPR | 1.4 | Liver | Chemotherapy+Immunotherapy | N |
| 36 | chemoimmunotherapy | IIIa | Non MPR | 3.9 | Brain，Intrathoracic | Immunotherapy | Y |
| 37 | chemoimmunotherapy | IIIa | pCR | 8.3 | Brain | Chemotherapy+Immunotherapy | Y |
| 38 | chemoimmunotherapy | IIIa | MPR | 3.9 | Intrathoracic | Chemotherapy+Radiotherapy | Y |
| 39 | chemoimmunotherapy | Ia | Non MPR | 12.9 | Liver | Chemotherapy+Immunotherapy | Y |
| 40 | chemoimmunotherapy | IIIa | Non MPR | 4.5 | Brain | Chemotherapy+Immunotherapy | Y |
| 41 | chemoimmunotherapy | IIb | pCR | 11.6 | Brain | Chemotherapy+Immunotherapy | Y |
| 42 | chemoimmunotherapy | IIIa | Non MPR | 2.1 | Liver | NO | N |

A total of 42 patients developed postoperative recurrence by the time of the last follow-up.

AJCC stage, American Joint Committee on Cancer Tumor Staging System; DFS, Disease-Free Survival; pCR, Pathological complete response; MPR, Major pathological response; Y, yes; N, no; mo, month.

**1.3 Supplementary Table 3.** Subsequent Therapy

| Subsequent Therapy, number (%) | Chemoimmunotherapy  (N=21) | Chemotherapy  (N=44) |
| --- | --- | --- |
| Chemotherapy | 18 (85.7) | 41 (93.2) |
| Immunotherapy | 17 (81.0) | 7 (15.9) |
| Radiotherapy | 2 (9.5) | 13 (61.9) |
| NO | 2 (9.5) | 3 (6.8) |

**1.4 Supplementary Table 4.** Adverse Events

| Characteristic | Chemoimmunotherapy  （N=21） | | Chemotherapy  （N=44） | |
| --- | --- | --- | --- | --- |
| Neoadjuvant trAEs, number (%) | Any Grade | Grade 3 or 4 | Any Grade | Grade 3 or 4 |
| All | 19（90.5） | 8（38.1） | 23（52.3） | 14（31.8） |
| Leading to discontinuation of treatment | 0（0） | 0（0） | 0（0） | 0（0） |
| Death | 0（0） | 0（0） | 0（0） | 0（0） |
| Event, number (%) |  |  |  |  |
| Myelosuppression | 14（66.7） | 7（33.3） | 23（52.3） | 12（27.3） |
| Nausea | 10（47.6） | 1（4.8） | 9（20.5） | 2（4.5） |
| Hepatitis | 7（33.3） | 0（0.0） | 18（40.9） | 0（0） |
| Hypothyroidism/Hyperthyroidism | 1（4.8） | 0（0.0） | 0（0.0） | 0（0） |
| Diarrhea | 2（9.5） | 0（0.0） | 0（0） | 0（0） |
| Rash | 0（0.0） | 0（0.0） | 0（0.0） | 0（0） |
| Pneumonitis | 0（0.0） | 0（0.0） | 0（0.0） | 0（0） |
| Hypersensitivity | 0（0.0） | 0（0.0） | 0（0.0） | 0（0） |
| Surgery-related adverse events，number (%) | 2（9.5） | 0（0.0） | 0（0.0） | 0（0.0） |
| Estimated blood loss, median (IQR), ml | 100（75-200） | NA | 100（100-350） | NA |

trAEs, treatment-related adverse events; IQR, interquartile range; NA, Not Applicable.
